# Supplementary material
Source: MDPI journal article supplement (https://www.mdpi.com/2079-3197/10/7/109)
Supplement: s1 [file s1]

**Figure S1: Key interacting residues between PLpro and ISG15**

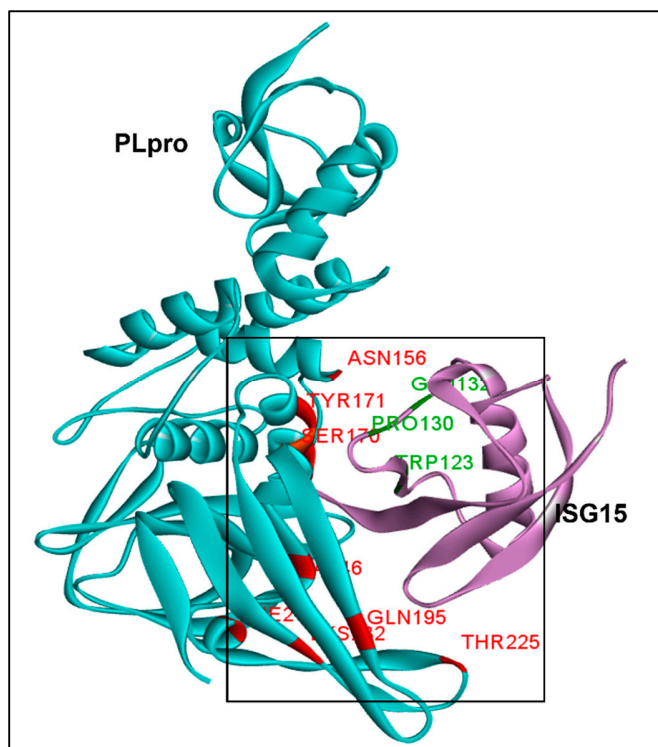

Figure S1. The key interacting residues of PLpro (Cyan) marked in Red and ISG15 (purple) marked in Green found to be critical for the improved de-ISGylation activity of PLpro (the key interacting residues adapted from (Klemm et al. 2020))

**Table S1.** Docking scores of various phytochemicals from *A. paniculata* (AG), *T. cordifolia* (GU), *O. sanctum* (TU) against SARS-CoV-2 (PLpro-ISG15) complex interacting site (PDB ID:6XA9)

| S. No. | Herb                           | Phytochemical                                             | Pubchem CID | Canonical SMILES                                                  | $\Delta G$ (kcal/mol)                           |
|--------|--------------------------------|-----------------------------------------------------------|-------------|-------------------------------------------------------------------|-------------------------------------------------|
|        |                                |                                                           |             |                                                                   | PLpro ISG15 interaction site at UIM (PDB: 6XA9) |
| 1      | <i>Andrographis paniculata</i> | 14-deoxy-15-isopropylidene-11,12-didehydroandrographolide | 637300      | <chem>CC(=C1C=C(C(=O)O1)C=CC2C(=C)CCC3C2(CCC(C3(C)CO)O)C)C</chem> | -9.4                                            |

|    |                             |                                            |           |                                                                                 |      |
|----|-----------------------------|--------------------------------------------|-----------|---------------------------------------------------------------------------------|------|
| 2  |                             | Andrographolactone                         | 44206466  | <chem>CC1=CC2=C(CCC1)C(=C(C(=C2)C)CCC3=CCOC3=O)C</chem>                         | -9.2 |
| 3  |                             | Neoandrographolide                         | 9848024   | <chem>CC1(CCCC2(C1CCC(=C)C2CCC3=CCOC3=O)C)COC4C(C(C(C(O4)CO)O)O)O</chem>        | -9   |
| 4  |                             | 14-Deoxy-11,12-didehydroandrographolide    | 5708351   | <chem>CC12CCC(C(C1CCC(=C)C2C=CC3=CCOC3=O)(C)CO)O</chem>                         | -8.8 |
| 5  |                             | Andrographolide                            | 5318517   | <chem>CC12CCC(C(C1CCC(=C)C2CC=C3C(COC3=O)O)(C)CO)O</chem>                       | -8.7 |
| 6  |                             | Andrographoside                            | 6439612   | <chem>CC12CCC(C(C1CCC(=C)C2CC=C3C(COC3=O)O)(C)COC4C(C(C(C(O4)CO)O)O)O)O</chem>  | -8.7 |
| 7  |                             | Andrograpanin                              | 11666871  | <chem>CC1(CCCC2(C1CCC(=C)C2CCC3=CCOC3=O)C)CO</chem>                             | -8.6 |
| 8  |                             | Andrographidoid D                          | 57384563  | <chem>CC1(CC(C2(C1COC(C2)O)O)O)OC(=O)C=CC3=CC=CC=C3</chem>                      | -8.6 |
| 9  |                             | 14-deoxyandrographolide                    | 11624161  | <chem>CC12CCC(C(C1CCC(=C)C2CCC3=CCOC3=O)(C)CO)O</chem>                          | -8.5 |
| 10 |                             | 5-hydroxy-7, 8, 2', 5'-tetramethoxyflavone | 10948318  | <chem>COC1=CC(=C(C(=C1)OC)C2=CC(=O)C3=C(O2)C(=C(C=C3O)OC)OC</chem>              | -8.4 |
| 11 |                             | Andrographidin C                           | 5318484   | <chem>COC1=C(C2=C(C(=C1)OC3C(C(C(C(O3)CO)O)O)C(=O)C=C(O2)C4=CC=CC=C4)OC</chem>  | -8.4 |
| 12 |                             | 14-deoxy-17-hydroxyandrographolide         | 11631693  | <chem>CC12CCC(C(C1CCC(C2CCC3=CCOC3=O)CO)(C)CO)O</chem>                          | -8.2 |
| 13 |                             | Andrographidoid A                          | 57384307  | <chem>CC1(CC(C2(C1COC(C2)OC)O)O)OC(=O)C=CC3=CC=CC=C3</chem>                     | -8.2 |
| 14 |                             | Andrographidoid C                          | 57384309  | <chem>CC1(CC(C2(C1COC(C2)OC)O)O)OC(=O)C=CC3=CC=CC=C3</chem>                     | -8.2 |
| 15 |                             | 5, 7, 2', 3'-tetramethoxyflavone           | 11772234  | <chem>COC1=CC=CC(=C1OC)C2=CC(=O)C3=C(O2)C=C(C=C3OC)OC</chem>                    | -8.1 |
| 16 |                             | 5-Hydroxy-2',3',7,8-Tetramethoxyflavone    | 5319878   | <chem>COC1=CC=CC(=C1OC)C2=CC(=O)C3=C(O2)C(=C(C=C3O)OC)OC</chem>                 | -8.1 |
| 17 |                             | Andrographidoid B                          | 57384308  | <chem>CC1(CC(C2(C1COC(C2)OC)O)O)OC(=O)C=CC3=CC=CC=C3</chem>                     | -8.1 |
| 18 |                             | 5-Hydroxy-7,2',3'-Trimethoxyflavone        | 12135219  | <chem>COC1=CC=CC(=C1OC)C2=CC(=O)C3=C(C=C(C=C3O2)OC)O</chem>                     | -7.9 |
| 19 |                             | Dihydroskullcapflavone                     | 12098358  | <chem>COC1=C(C2=C(C(=O)CC(O2)C3=CC=CC=C3O)C(=C1)O)OC</chem>                     | -7.9 |
| 20 |                             | 1, 8-dihydroxy-3,7-dimethoxyxanthone       | 5281653   | <chem>COC1=C(C2=C(C=C1)OC3=CC(=CC(=C3C2=O)O)OC)O</chem>                         | -7.8 |
| 21 |                             | 7-O-methylwogonin                          | 188316    | <chem>COC1=C(C2=C(C(=C1)O)C(=O)C=C(O2)C3=CC=CC=C3)OC</chem>                     | -7.8 |
| 22 |                             | 7-O-methyldihydrowogonin                   | 146156496 | <chem>COC1=C(C2=C(CC(=O)C(O2)C3=CC=CC=C3)C(=C1)O)OC</chem>                      | -7.4 |
| 23 |                             | Andrographidoid E                          | 57384564  | <chem>CC1(CC(C2=C1COC(=O)C2)O)O</chem>                                          | -6.2 |
| 24 | <i>Tinospora cordifolia</i> | Isocolumbin                                | 24721165  | <chem>CC12CCC3C(=O)OC(CC3(C1C4C=CC2(C(=O)O4)O)C)C5=COC=C5</chem>                | -9.9 |
| 25 |                             | Berberin                                   | 2353      | <chem>COC1=C(C2=C([N+])3=C(C=C2C=C1)C4=CC5=C(C=C4CC3)OC(O5)OC</chem>            | -9.4 |
| 26 |                             | Ecdysterone                                | 12304165  | <chem>CC12CCC3C(=CC(=O)C4C3(CC(C(C4)O)O)C)C1(CCC2C(C)(C(CCC(C)(C)O)O)O)O</chem> | -9   |

|    |                       |                     |           |                                                                                          |      |
|----|-----------------------|---------------------|-----------|------------------------------------------------------------------------------------------|------|
| 27 |                       | Magnoflorine        | 73337     | <chem>C[N+]1(CCC2=CC(=C(C3=C2C1CC4=C3C(=C(C=C4)OC)O)OC)C</chem>                          | -9   |
| 28 |                       | Beta-Sitosterol     | 222284    | <chem>CCC(CCC(C)C1CCC2C1(CCC3C2CC=C4C3(CCC(C4)O)C)C(C)C</chem>                           | -8.4 |
| 29 |                       | Tetrahydropalmatine | 5417      | <chem>COC1=C(C2=C(CC3C4=CC(=C(C=C4CCN3C2)OC)OC)C=C1)OC</chem>                            | -8.4 |
| 30 |                       | Tinocordiside       | 102504931 | <chem>CC1=CC(=O)C2C3C1C2(CCC3C(C)(C)OC4C(C(C(C(O4)CO)O)O)O)C</chem>                      | -8.4 |
| 31 |                       | Makisterone B       | 441830    | <chem>CC(C(C(C(C)C1CCC2(C1(CCC3C2=CC(=O)C4C3(CC(C(C4)O)O)C)C)O)O)O)C(C)CO</chem>         | -8.3 |
| 32 |                       | Tinocordifolioside  | 100926541 | <chem>CC1=CC(=O)C2(C(C(C1)C(C3C2O3)C(C)(C)OC4C(C(C(C(O4)CO)O)O)O)C</chem>                | -8.3 |
| 33 |                       | Tinosporaside       | 14194109  | <chem>CC12CCC3C(=O)OC(CC3(C1C(=O)C=CC2OC4C(C(C(C(O4)CO)O)O)O)C)C5=COC=C5</chem>          | -8.2 |
| 34 |                       | Palmatine           | 19009     | <chem>COC1=C(C2=C[N+]3=C(C=C2C=C1)C4=CC(=C(C=C4CC3)OC)OC)OC</chem>                       | -8.1 |
| 35 |                       | Cordioside          | 101915817 | <chem>CC12CC(OC(=O)C1(CC(C3=C(CCCC23)C(=O)OC)OC4C(C(C(C(O4)CO)O)O)O)O)C5=COC=C5</chem>   | -8   |
| 36 |                       | Tinocordifolin      | 100926540 | <chem>CC1=CC(=O)C2(C(C(C1)C(C3C2O3)C(C)(C)O)C</chem>                                     | -7.9 |
| 37 |                       | Tinospinoside E     | 71473390  | <chem>CC12CC=C3C(=O)OC(CC3(C1C4C=CC2(C(=O)O4)OC5C(C(C(C(O5)CO)O)O)O)O)C)C6=COC=C6</chem> | -7.6 |
| 38 |                       | Tinosinen           | 45359937  | <chem>COC1=CC(=CC(=C1OC2C(C(C(C(O2)CO)O)OC3C(C(CO3)(CO)O)O)O)OC)C=CCO</chem>             | -7.4 |
| 39 |                       | Syringin            | 5316860   | <chem>COC1=CC(=CC(=C1OC2C(C(C(C(O2)CO)O)O)O)OC)C=C</chem>                                | -7.1 |
| 40 |                       | Z-syringin          | 9799599   | <chem>COC1=CC(=CC(=C1OC2C(C(C(C(O2)CO)O)O)O)OC)C=C</chem>                                | -6.8 |
| 41 | <i>Ocimum sanctum</i> | Orientin            | 5281675   | <chem>C1=CC(=C(C=C1C2=CC(=O)C3=C(O2)C(=C(C=C3O)O)C4C(C(C(C(O4)CO)O)O)O)O</chem>          | -9.4 |
| 42 |                       | Isoorientin         | 114776    | <chem>C1=CC(=C(C=C1C2=CC(=O)C3=C(O2)C(=C(C=C3O)C4C(C(C(C(O4)CO)O)O)O)O)O</chem>          | -9.2 |
| 43 |                       | Vitexin             | 5280441   | <chem>C1=CC(=CC(=C1C2=CC(=O)C3=C(O2)C(=C(C=C3O)O)C4C(C(C(C(O4)CO)O)O)O)O</chem>          | -9.1 |
| 44 |                       | Isovitexin          | 162350    | <chem>C1=CC(=CC(=C1C2=CC(=O)C3=C(O2)C(=C(C=C3O)C4C(C(C(C(O4)CO)O)O)O)O</chem>            | -9   |
| 45 |                       | Molludistin         | 44258315  | <chem>COC1=C(C2=C(C(=C1)O)C(=O)C=C(O2)C3=CC=C(C=C3)O)C4C(C(C(CO4)O)O)O</chem>            | -8.8 |
| 46 |                       | Ursolic acid        | 64945     | <chem>CC1CCC2(CCC3(C(=CCC4C3(CCC5C4(CCC(C5(C)C)O)C)C2C1C)C)C(=O)O</chem>                 | -8.7 |
| 47 |                       | Luteolin            | 5280445   | <chem>C1=CC(=C(C=C1C2=CC(=O)C3=C(C=C(C=C3O2)O)O)O</chem>                                 | -8.6 |
| 48 |                       | Apigenin            | 5280443   | <chem>C1=CC(=CC(=C1C2=CC(=O)C3=C(C=C(C=C3O2)O)O)O</chem>                                 | -8.4 |
| 49 |                       | Chlorogenic acid    | 1794427   | <chem>C1C(C(C(C(C1(C(=O)O)O)OC(=O)C=CC2=CC(=C(C=C2)O)O)O)O</chem>                        | -8.3 |
| 50 |                       | Stigmasterol        | 5280794   | <chem>CCC(C=CC(C)C1CCC2C1(CCC3C2CC=C4C3(CCC(C4)O)C)C(C)C</chem>                          | -8.3 |
| 51 |                       | Oleanolic acid      | 10494     | <chem>CC1(CCC2(CCC3(C(=CCC4C3(CCC5C4(CCC(C5(C)C)O)C)C2C1)C)C(=O)O)C</chem>               | -8   |
| 52 |                       | Esculin             | 5281417   | <chem>C1=CC(=O)OC2=CC(=C(C=C2)OC3C(C(C(C(O3)CO)O)O)O</chem>                              | -7.9 |
| 53 |                       | β-Guaiene           | 6949      | <chem>CC1CCC(=C(C)C)CC2=C1CCC2C</chem>                                                   | -7.7 |
| 54 |                       | Caryophyllene oxide | 1742210   | <chem>CC1(CC2C1CCC3(C(O3)CCC2=C)C)C</chem>                                               | -7.5 |
| 55 |                       | Humulene            | 5281520   | <chem>CC1=CCC(C=CCC(=CCC1)C)C(C)C</chem>                                                 | -7.5 |
| 56 |                       | beta-Gurjunene      | 6450812   | <chem>CC1CCC2C(C2(C)C)C3C1CCC3=C</chem>                                                  | -7.4 |

|    |                  |                  |              |                                                                                 |      |
|----|------------------|------------------|--------------|---------------------------------------------------------------------------------|------|
| 57 |                  | Cubenol          | 51985<br>7   | <chem>CC1CCC(C2C1(CCC(=C2)C)O)C(C)C</chem>                                      | -7.4 |
| 58 |                  | Germacrene a     | 95487<br>05  | <chem>CC1=CCCC(=CCC(CC1)C(=C)C)C</chem>                                         | -7.2 |
| 59 |                  | Retinol          | 44535<br>4   | <chem>CC1=C(C(CCC1)(C)C)C=CC(=CC=CC(=CCO)C)C</chem>                             | -7.2 |
| 60 |                  | alpha-Selinene   | 10123        | <chem>CC1=CCCC2(C1CC(CC2)C(=C)C)C</chem>                                        | -7.1 |
| 61 |                  | Bornyl Acetate   | 6448         | <chem>CC(=O)OC1CC2CCC1(C2(C)C)C</chem>                                          | -6.7 |
| 62 |                  | Esculetin        | 52814<br>16  | <chem>C1=CC(=O)OC2=CC(=C(C=C21)O)O</chem>                                       | -6.6 |
| 63 |                  | Farnesol         | 44507<br>0   | <chem>CC(=CCCC(=CCCC(=CCO)C)C)C</chem>                                          | -6.4 |
| 64 |                  | Caffeic acid     | 68904<br>3   | <chem>C1=CC(=C(C=C1C=CC(=O)O)O)O</chem>                                         | -6.3 |
| 65 |                  | Phytol           | 52804<br>35  | <chem>CC(C)CCCC(C)CCCC(C)CCCC(=CCO)C</chem>                                     | -6.3 |
| 66 |                  | Camphor          | 2537         | <chem>CC1(C2CCC1(C(=O)C2)C)C</chem>                                             | -6.1 |
| 67 |                  | Borneol          | 64685        | <chem>CC1(C2CCC1(C(C2)O)C)C</chem>                                              | -6   |
| 68 |                  | Eucalyptol       | 2758         | <chem>CC1(C2CCC(O1)(CC2)C)C</chem>                                              | -6   |
| 69 |                  | Farnesene        | 52815<br>16  | <chem>CC(=CCCC(=CCC=C(C)C=C)C)C</chem>                                          | -6   |
| 70 |                  | Gallic acid      | 370          | <chem>C1=C(C=C(C(=C1O)O)O)C(=O)O</chem>                                         | -6   |
| 71 |                  | Linolenic acid   | 52809<br>34  | <chem>CCC=CCC=CCC=CCCCCCCCC(=O)O</chem>                                         | -6   |
| 72 |                  | Eugenol          | 3314         | <chem>COC1=C(C=CC(=C1)CC=C)O</chem>                                             | -5.9 |
| 73 |                  | Methyl chavicol  | 8815         | <chem>COC1=CC=C(C=C1)CC=C</chem>                                                | -5.9 |
| 74 |                  | Ascorbic acid    | 54670<br>067 | <chem>C(C(C1C(=C(C(=O)O1)O)O)O)O</chem>                                         | -5.8 |
| 75 |                  | Camphene         | 6616         | <chem>CC1(C2CCC(C2)C1=C)C</chem>                                                | -5.6 |
| 76 |                  | D-Limonene       | 44091<br>7   | <chem>CC1=CCC(CC1)C(=C)C</chem>                                                 | -5.6 |
| 77 |                  | Linoleic acid    | 52804<br>50  | <chem>CCCCC=CCC=CCCCCCCCC(=O)O</chem>                                           | -5.6 |
| 78 |                  | β-Pinene         | 14896        | <chem>CC1(C2CCC(=C)C1C2)C</chem>                                                | -5.6 |
| 79 |                  | alpha-Pinene     | 6654         | <chem>CC1=CCC2CC1C2(C)C</chem>                                                  | -5.5 |
| 80 |                  | Sabinene         | 18818        | <chem>CC(C)C12CCC(=C)C1C2</chem>                                                | -5.5 |
| 81 |                  | Galuteolin       | 52806<br>37  | <chem>C1=CC(=C(C=C1C2=CC(=O)C3=C(C=C(C=C3O2)OC4C(C(C(C(O4)CO)O)O)O)O)O)O</chem> | -5.4 |
| 82 |                  | alpha-Thujene    | 17868        | <chem>CC1=CCC2(C1C2)C(C)C</chem>                                                | -5.3 |
| 83 |                  | Linalool         | 6549         | <chem>CC(=CCCC(C)(C=C)O)C</chem>                                                | -5.3 |
| 84 |                  | Oleic acid       | 44563<br>9   | <chem>CCCCCCCC=CCCCCCCCC(=O)O</chem>                                            | -5.3 |
| 85 |                  | Palmitic acid    | 985          | <chem>CCCCCCCCCCCCCCCC(=O)O</chem>                                              | -5.3 |
| 86 |                  | (E)-beta-Ocimene | 52815<br>53  | <chem>CC(=CCC=C(C)C=C)C</chem>                                                  | -5.1 |
| 87 |                  | Benzaldehyde     | 240          | <chem>C1=CC=C(C=C1)C=O</chem>                                                   | -4.9 |
| 88 |                  | alpha-Myrcene    | 51932<br>4   | <chem>CC(=C)CCCC(=C)C=C</chem>                                                  | -4.8 |
| 89 |                  | 2-Furaldehyde    | 7362         | <chem>C1=COC(=C1)C=O</chem>                                                     | -4.3 |
| 90 |                  | Heptan-1-ol      | 8129         | <chem>CCCCCCCCO</chem>                                                          | -4.3 |
|    | Positive control | GRL0617          | 24941<br>262 | <chem>CC1=C(C=C(C=C1)N)C(=O)NC(C)C2=CC=CC3=CC=CC=C32</chem>                     | -8.5 |

**Table S2. (i).** Drug-likeness properties of the top-ranking phytochemicals from *A. paniculate*, *T. cordifolia*, *O. sanctum*, and GRL0617.

| S.No<br>. | Herb                 | Phytoconstituents                                                                                                                                     | Molecular formula | ADME properties (Lipinski's Rule of Five) |              | Drug Likeness |
|-----------|----------------------|-------------------------------------------------------------------------------------------------------------------------------------------------------|-------------------|-------------------------------------------|--------------|---------------|
|           |                      |                                                                                                                                                       |                   | Properties                                | Value        |               |
| 1         | <i>A. paniculata</i> | 14-deoxy-15-isopropylidene-11,12-didehydroandrographolide (AG1)<br>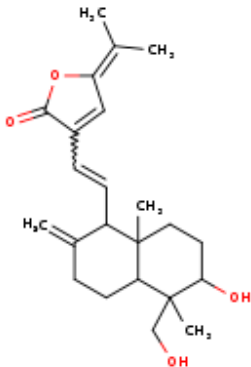 | C23H32O4          | Molecular weight (<500 Da)                | 372.50 g/mol | YES           |
|           |                      |                                                                                                                                                       |                   | LogP (<5)                                 | 3.52         |               |
|           |                      |                                                                                                                                                       |                   | H-Bond donor (<5)                         | 2            |               |
|           |                      |                                                                                                                                                       |                   | H-Bond acceptor (<10)                     | 4            |               |
|           |                      |                                                                                                                                                       |                   | Violations                                | 0            |               |
| 2         | <i>T. cordifolia</i> | Isocolumbin (GU1)<br>                                              | C20H22O6          | Molecular weight (<500 Da)                | 358.39 g/mol | YES           |
|           |                      |                                                                                                                                                       |                   | LogP (<5)                                 | 2.12         |               |
|           |                      |                                                                                                                                                       |                   | H-Bond donor (<5)                         | 1            |               |

|   |                   |                                                                                                  |                                                  |                                                                                                     |                                      |     |
|---|-------------------|--------------------------------------------------------------------------------------------------|--------------------------------------------------|-----------------------------------------------------------------------------------------------------|--------------------------------------|-----|
|   |                   |                                                                                                  |                                                  | H-Bond acceptor (<10)                                                                               | 6                                    |     |
|   |                   |                                                                                                  |                                                  | Violations                                                                                          | 0                                    |     |
| 3 | <i>O. sanctum</i> | Orientin (TU1) 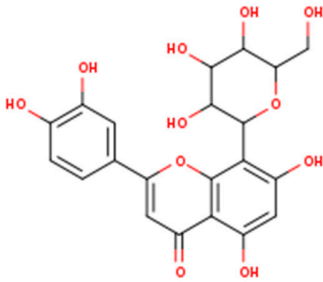 | C <sub>21</sub> H <sub>20</sub> O <sub>11</sub>  | Molecular weight (<500 Da)<br>LogP (<5)<br>H-Bond donor (<5)<br>H-Bond acceptor (<10)<br>Violations | 448.38 g/mol<br>1.27<br>8<br>11<br>2 | NO  |
| 4 | GRL0617           | GRL0617       | C <sub>20</sub> H <sub>20</sub> N <sub>2</sub> O | Molecular weight (<500 Da)<br>LogP (<5)<br>H-Bond donor (<5)                                        | 304.39 g/mol<br>2.69<br>2            | YES |

|  |  |  |  |                       |   |  |
|--|--|--|--|-----------------------|---|--|
|  |  |  |  | H-Bond acceptor (<10) | 1 |  |
|  |  |  |  | Violations            | 0 |  |

**Table S2. (ii).** Pharmacokinetic properties (ADMET) prediction for the top-ranking phytoconstituents from *A. paniculate*, *T. cordifolia*, *O. sanctum*, and **GRL0617**.

| Property            | Model Name                         | AG1         | GU1         | TU1         | GRL0617     |
|---------------------|------------------------------------|-------------|-------------|-------------|-------------|
| <b>Absorption</b>   | Buffer solubility (mg/L)           | 0.53        | 32388.1     | 562.68      | 5.81        |
|                     | Caco2 permeability (nm/sec)        | 22.12       | 21.91       | 3.00        | 21.65       |
|                     | Human Intestinal Absorption (%)    | 93.75       | 95.26       | 14.99       | 94.85       |
|                     | MDCK cell permeability (nm/sec)    | 0.06        | 55.59       | 0.70        | 9.90        |
|                     | P-glycoprotein inhibition          | Inhibitor   | Non         | Non         | Non         |
|                     | Plasma Protein Binding (%)         | 98.92       | 88.65       | 63.12       | 86.11       |
|                     | Pure water solubility (mg/L)       | 3.06        | 23.84       | 256.36      | 1.42        |
|                     | Skin Permeability (logKp, cm/hour) | -1.73       | -3.47       | -4.69       | -2.59       |
| <b>Distribution</b> | BBB (C.brain/C.blood)              | 1.22        | 0.22        | 0.03        | 1.40        |
| <b>Metabolism</b>   | CYP2C19 inhibition                 | Non         | Non         | Inhibitor   | Non         |
|                     | CYP2C9 inhibition                  | Inhibitor   | Inhibitor   | Inhibitor   | Non         |
|                     | CYP2D6 inhibition                  | Non         | Non         | Non         | Non         |
|                     | CYP2D6 substrate                   | Non         | Non         | Non         | Non         |
|                     | CYP3A4 inhibition                  | Inhibitor   | Inhibitor   | Inhibitor   | Non         |
|                     | CYP3A4 substrate                   | Substrate   | Substrate   | Weakly      | Substrate   |
| <b>Toxicity</b>     | acute algae toxicity               | 0.0129867   | 0.10331     | 0.0208      | 0.028122    |
|                     | Ames test                          | mutagen     | mutagen     | non-mutagen | mutagen     |
|                     | hERG inhibition                    | medium risk | medium risk | high risk   | medium risk |

Abbreviations: 14-deoxy-15-isopropylidene-11,12-didehydroandrographolide (AG1), Isocolumbin (GU1), Orientin (TU1), ADMET, absorption, distribution, metabolism, excretion, and toxicity; BBB, blood-brain barrier; CYP, cytochrome P; hERG, human ether-a-go-go-related gene.



### Principle component analysis (PCA)

The molecular dynamics trajectories were used for PCA to identify the conformational motions relevant to protein functions. Eigenvalues were used to calculate the conformational changes due to the movement of atoms (Khan et al., 2016). The eigenvalues were generated by diagonalizing the covariance matrix of the C $\alpha$  atomic fluctuations against the equivalent Eigenvectors' (EV) indices. The first 10 modes were taken into consideration in the analysis of the essential subspace as they cover >95% variance of the protein where an exponentially decaying curve of eigenvalues is obtained against the EVs (Supplementary Figure- 2). In this study, PC1 and PC2 that dominate the protein conformational fluctuations were also used for the analysis of PLpro without ligand and in the complexes. For the first two PCs taken into consideration, simulation results revealed the subspace dimension for PLpro in the unbound state and in the complex is comparable, with no noticeable large difference in the dimension (Supplementary Figure- 1). This is also reflected in their 2D projection plots of trajectories, with similar trace values of the covariance matrix for both.

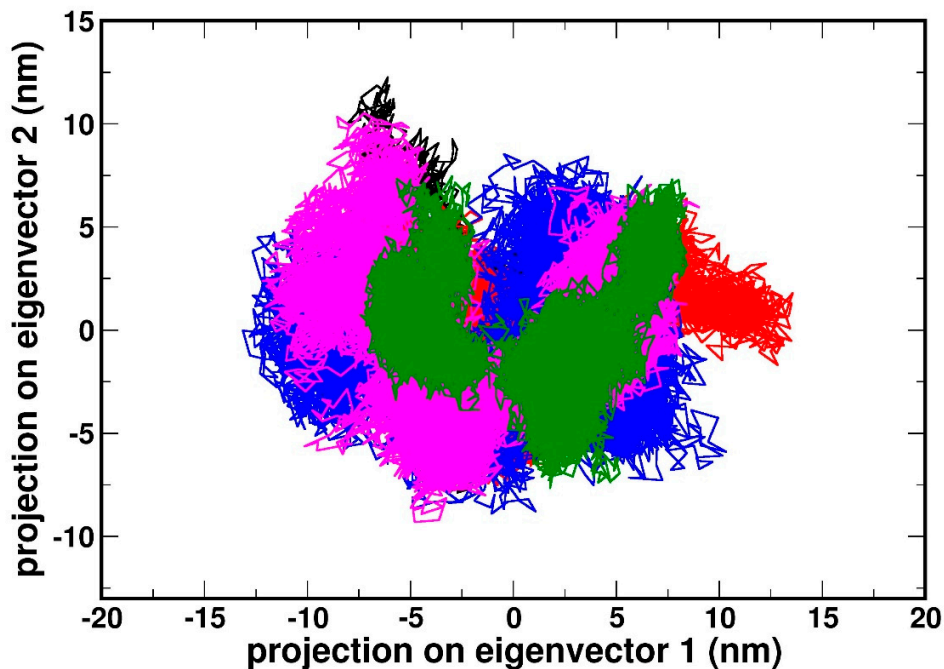

**Figure S2.** Principal component analysis (PCA) of (PLpro-ISG15) in the unbound state (Black color) and in the (PLpro-ISG15) complex-AG1 (Red color), (PLpro-ISG15) complex-GU1(Blue color), (PLpro-ISG15) complex-TU1(magenta color) and (PLpro-ISG15) complex-GRL0617 (Green color). The 2D projection plot of the first two principal eigenvectors
